# Supplementary material for: Clinical nurses’ beliefs, knowledge, organizational readiness and level of implementation of evidence-based practice: The first step to creating an evidence-based practice culture
Source: PubMed Central journal article supplement (PMC6932768; doi:10.1371/journal.pone.0226742), 2019-12-26
Supplement: pone.0226742.s002.pdf [file pone.0226742.s002.pdf]

S1 Fig. The original questionnaire (Korean version).

※ 다음은 근거기반실무에 대한 신념을 묻는 질문입니다. 정답이나 오답은 없습니다. 각 문항을 읽고 귀하의 생각과 가장 가까운 곳에 V 표시해주세요.

| 문항                                                       | 매우 부정 | 부정 | 보통 | 긍정 | 매우 긍정 |
|----------------------------------------------------------|-------|----|----|----|-------|
| 1. 나는 근거기반실무가 환자들에게 최상의 간호를 제공한다고 믿는다.                   | 1     | 2  | 3  | 4  | 5     |
| 2. 나는 근거기반실무의 단계를 명확하게 알고 있다.                            | 1     | 2  | 3  | 4  | 5     |
| 3. 나는 내가 근거기반실무를 실행할 수 있다고 확신한다.                         | 1     | 2  | 3  | 4  | 5     |
| 4. 나는 근거를 비판적으로 평가하는 것이 근거기반실무의 중요한 단계라고 믿는다.            | 1     | 2  | 3  | 4  | 5     |
| 5. 나는 근거기반 실무지침이 임상 간호를 향상시킨다고 생각한다.                     | 1     | 2  | 3  | 4  | 5     |
| 6. 나는 내가 임상질문에 적합한 최상의 근거를 빠른 시간 내에 효율적으로 검색할 수 있다고 믿는다. | 1     | 2  | 3  | 4  | 5     |
| 7. 나는 근거기반실무를 수행하는데 장애가 되는 요소들을 내가 극복할 수 있다고 믿는다.        | 1     | 2  | 3  | 4  | 5     |
| 8. 나는 근거기반실무를 빠른 시간 내에 효율적으로 수행할 수 있다고 확신한다.             | 1     | 2  | 3  | 4  | 5     |
| 9. 나는 근거기반실무를 적용하는 것이 내가 환자들에게 제공하는 간호를 향상시킬 것이라고 믿는다.   | 1     | 2  | 3  | 4  | 5     |
| 10. 나는 임상간호의 결과를 어떻게 측정하는지 확실히 알고 있다.                    | 1     | 2  | 3  | 4  | 5     |
| 11. 나는 근거기반실무는 시간이 너무 많이 소요된다고 생각한다.                     | 1     | 2  | 3  | 4  | 5     |
| 12. 나는 근거기반실무를 수행하는데 필요한 최상의 자원에 접근할 수 있다고 믿는다.          | 1     | 2  | 3  | 4  | 5     |
| 13. 나는 근거기반실무가 어렵다고 생각한다.                                | 1     | 2  | 3  | 4  | 5     |
| 14. 나는 실무에 변화를 일으킬 만큼 충분한 근거기반실무 수행 방법을 알고 있다.           | 1     | 2  | 3  | 4  | 5     |
| 15. 나는 내가 일하는 곳에서 근거기반실무를 적용할 수 있는 능력이 나에게 충분히 있다고 확신한다. | 1     | 2  | 3  | 4  | 5     |
| 16. 나는 내가 제공하는 간호가 근거에 기반하고 있다고 믿는다.                     | 1     | 2  | 3  | 4  | 5     |

※ 다음은 근거기반실무에 대한 지식과 기술을 묻는 질문입니다. 정답이나 오답은 없습니다. 각 문항을 읽고 귀하가 현재 어느 정도를 갖추고 있다고 생각하는지, 가장 가까운 곳에 V 표시해주세요.

| 문 항                                              | ←—————→  |   |   |   |   |   |          |
|--------------------------------------------------|----------|---|---|---|---|---|----------|
|                                                  | 매우<br>부족 |   |   |   |   |   | 매우<br>탁월 |
| 1. 간호연구 수행 능력                                    | 1        | 2 | 3 | 4 | 5 | 6 | 7        |
| 2. 환자 간호/치료와 관련된 근거를 찾기 위한 IT (정보검색 및 사용) 활용 능력  | 1        | 2 | 3 | 4 | 5 | 6 | 7        |
| 3. 자신 또는 동료의 간호실무에 대한 검토와 모니터링                   | 1        | 2 | 3 | 4 | 5 | 6 | 7        |
| 4. 필요로 하는 실무지식을 연구문제로 전환하는 능력                    | 1        | 2 | 3 | 4 | 5 | 6 | 7        |
| 5. 환자 간호/치료 관련 과학적 지식 및 주요 정보의 종류와 출처를 알 수 있는 능력 | 1        | 2 | 3 | 4 | 5 | 6 | 7        |
| 6. 자신의 실무영역에서 과학적 근거가 필요한 부분을 파악할 수 있는 능력        | 1        | 2 | 3 | 4 | 5 | 6 | 7        |
| 7. 실무를 위한 근거자료를 어떻게 찾는지에 대한 지식                   | 1        | 2 | 3 | 4 | 5 | 6 | 7        |
| 8. 기존의 표준에 반대되는 근거를 비판적으로 분석하는 능력                | 1        | 2 | 3 | 4 | 5 | 6 | 7        |
| 9. 본인이 찾은 지식/근거가 얼마나 과학적으로 타당한지를 판단할 수 있는 능력     | 1        | 2 | 3 | 4 | 5 | 6 | 7        |
| 10. 근거 자료가 임상적으로 적용가능한지 결정할 수 있는 능력              | 1        | 2 | 3 | 4 | 5 | 6 | 7        |
| 11. 환자의 선호도 및 병동의 상황을 고려하여 근거(정보)를 적용할 수 있는 능력   | 1        | 2 | 3 | 4 | 5 | 6 | 7        |
| 12. 동료들과 근거에 대한 아이디어와 정보를 공유하는 것                 | 1        | 2 | 3 | 4 | 5 | 6 | 7        |
| 13. 동료에게 간호 관련 문제 및 이와 관련된 새로운 아이디어를 전달하는 것      | 1        | 2 | 3 | 4 | 5 | 6 | 7        |
| 14. 자신이 수행한 간호 업무와 그 결과를 평가할 수 있는 능력             | 1        | 2 | 3 | 4 | 5 | 6 | 7        |

※ 다음은 근거기반실무에 대한 조직의 준비수준에 관한 질문입니다. 정답이나 오답은 없습니다. 각 문항을 읽고 귀하가 근무하고 계시는 병원의 근거기반실무 확산을 위한 준비가 어느 정도인지 가장 적절한 곳에 V 표시해주세요.

| 문 항                                                                                                    | 전혀 없음 | 약간<br>그려함 | 다소/<br>보통임 | 상당히<br>있음 | 매우 잘<br>되어(하고/<br>많이) 있음 |
|--------------------------------------------------------------------------------------------------------|-------|-----------|------------|-----------|--------------------------|
| 1. 조선대병원의 <b>미션과 철학</b> 에는 근거기반실무가 명확하게 기술되어 있습니까?                                                     | 1     | 2         | 3          | 4         | 5                        |
| 2. 조선대병원에서는 근거기반실무가 <b>얼마나</b> 수행되고 있다고 여깁니까?                                                          | 1     | 2         | 3          | 4         | 5                        |
| 3. 조선대병원에서의 <b>간호사</b> 들은 근거기반실무에 어느 정도 참여하고 있습니까?                                                     | 1     | 2         | 3          | 4         | 5                        |
| 4. 당신과 함께 일하고 있는 <b>의료팀</b> 은 근거기반실무에 어느 정도 참여하고 있습니까?                                                 | 1     | 2         | 3          | 4         | 5                        |
| 5. 조선대병원의 <b>행정가(경영진, 행정직)</b> 들은 근거기반실무에 어느 정도 참여하고 있습니까?<br>(즉, 근거기반실무 착수를 위한 자원[예, 시간]과 지원을 계획하는 일) | 1     | 2         | 3          | 4         | 5                        |
| 6. 조선대병원에는 근거기반실무에 대한 지식과 기술이 <b>매우 뛰어난 간호사</b> 들이 충분히 확보되어 있습니까?                                      | 1     | 2         | 3          | 4         | 5                        |
| 7. 조선대병원에는 근거가 없을 때 근거를 도출할 수 있는 <b>간호학자들(박사급 수준의 연구원, 박사학위 소지 간호사)</b> 들이 얼마나 있습니까?                   | 1     | 2         | 3          | 4         | 5                        |
| 8. 조선대병원에는 일반간호사 뿐만 아니라 다른 전문간호사들에게 근거기반실무를 가르쳐 줄 수 있는 <b>멘토 역할</b> 을 하는 간호사가 얼마나 있습니까?                | 1     | 2         | 3          | 4         | 5                        |
| 9. 조선대병원의 <b>의사</b> 들은 임상 현장에서 근거기반실무를 얼마나 적용합니까?                                                      | 1     | 2         | 3          | 4         | 5                        |
| 10. 조선대병원의 일반간호사들은 최상의 근거를 찾기 위하여 <b>질 좋은 컴퓨터와 전자 데이터 베이스</b> 를 얼마나 접하고 있습니까?                          | 1     | 2         | 3          | 4         | 5                        |
| 11. 조선대병원의 일반간호사들은 <b>컴퓨터 활용 기술</b> 이 얼마나 능숙합니까?                                                       | 1     | 2         | 3          | 4         | 5                        |
| 12. 조선대병원에서 이용할 수 있는 <b>도서관 사서(대학 중앙도서관 사서 포함)</b> 는 근거기반실무에 대한 지식과 기술을 얼마나 갖고 있습니까?                   | 1     | 2         | 3          | 4         | 5                        |
| 13. 조선대병원에서 이용할 수 있는 <b>도서관 사서(대학 중앙도서관 사서 포함)</b> 가 근거 검색에 얼마나 활용되나요?                                 | 1     | 2         | 3          | 4         | 5                        |
| 14. 조선대병원에는 근거기반실무를 지원하는 자원은 얼마나 있습니까?<br>(근거기반실무 세미나/워크숍 교육, 인사고과 반영, 수당, 컴퓨터, 멘토, 도서관, 도서관 사서 등)     | 1     | 2         | 3          | 4         | 5                        |

| 문 항                                                                                | 전혀<br>없음                 | 거의<br>없음                 | 보통<br>있음                 | 대체로<br>있음                | 매우 잘<br>되어(하고/<br>많이) 있음 |
|------------------------------------------------------------------------------------|--------------------------|--------------------------|--------------------------|--------------------------|--------------------------|
| <b>* 조선대병원에는 다음의 각 영역에서, 근거기반실무 챔피언 (전문가 혹은 근거기반실무를 추진시킬 수 있는 인력)이 있다고 생각하십니까?</b> |                          |                          |                          |                          |                          |
| 15. 간호행정가(간호행정부서, 수간호사, 간호팀장, 간호부장 등)                                              | 1                        | 2                        | 3                        | 4                        | 5                        |
| 16. 의사                                                                             | 1                        | 2                        | 3                        | 4                        | 5                        |
| 17. 간호교육자                                                                          | 1                        | 2                        | 3                        | 4                        | 5                        |
| 18. 전문간호사                                                                          | 1                        | 2                        | 3                        | 4                        | 5                        |
| 19. 일반간호사                                                                          | 1                        | 2                        | 3                        | 4                        | 5                        |
| 20. 조선대병원에는 '성과를 측정하고 공유하는 것'이 조직 문화로 얼마나 자리 잡고 있다고 생각하십니까?                        | 1                        | 2                        | 3                        | 4                        | 5                        |
| <b>문 항</b>                                                                         |                          |                          |                          |                          |                          |
| <b>* 조선대병원의 주요 정책 관련 의사결정에 있어서 다음의 각 그룹이 참여하는 정도는?</b>                             |                          |                          |                          |                          |                          |
| 21. 직접 간호 제공자 (간호사)                                                                | 0%                       | 25%                      | 50%                      | 75%                      | 100%                     |
| 22. 병원 경영진                                                                         | 0%                       | 25%                      | 50%                      | 75%                      | 100%                     |
| 23. 의사나 타 건강관리 제공자 그룹                                                              | 0%                       | 25%                      | 50%                      | 75%                      | 100%                     |
| <b>문 항</b>                                                                         |                          |                          |                          |                          |                          |
| 24. 종합적으로, 조선대학교병원의 근거기반실무 준비도를 어떻게 평가하십니까?                                        | 전혀<br>준비 안 됨<br>①        | 준비<br>중임<br>②            | 준비완료<br>/미수행<br>③        | 막 수행<br>시작<br>④          | 수행<br>잘됨<br>⑤            |
| 25. 6개월 전과 비교해 볼 때, 귀 병원에는 근거기반실무 문화로 나아가는 움직임이 얼마나 있습니까? (옆에 빈칸에 표시를 해주세요)        | <input type="checkbox"/> | <input type="checkbox"/> | <input type="checkbox"/> | <input type="checkbox"/> | <input type="checkbox"/> |
|                                                                                    | 전혀 없음                    |                          |                          | 매우 잘 됨                   |                          |

※ 다음은 근거기반실무의 수행에 대한 질문입니다. 얼마나 자주 해야 한다고 정해진 기준은 없습니다.

귀하께서 **지난 8주간** 아래 항목들을 얼마나 자주 시행했는지, 해당하는 곳에 V 표시해주세요.

| 문 항                                                                                                                                      | 0회 | 1-3회 | 4-5회 | 6-7회 | 8회 이상 |
|------------------------------------------------------------------------------------------------------------------------------------------|----|------|------|------|-------|
| 1. 나는 임상실무를 변화시키기 위해 근거를 활용하였다.                                                                                                          | 0회 | 1-3회 | 4-5회 | 6-7회 | 8회 이상 |
| 2. 나는 연구에서 나온 근거를 비판적으로 평가하였다.                                                                                                           | 0회 | 1-3회 | 4-5회 | 6-7회 | 8회 이상 |
| 3. 나는 나의 임상실무에 대한 PICO* 형태의 임상질문을 도출하였다.<br>*P: 환자, 관심 집단, 간호문제, I: 환자를 위한 새로운 중재나 간호방법, C: 기존의 간호중재나 비교할 중재, O: 기대하는 결과                 | 0회 | 1-3회 | 4-5회 | 6-7회 | 8회 이상 |
| 4. 나는 연구에서 나온 근거에 대해 동료와 비공식적으로 토론하였다.                                                                                                   | 0회 | 1-3회 | 4-5회 | 6-7회 | 8회 이상 |
| 5. 나는 환자 문제에 대한 자료를 별도로 수집하였다.                                                                                                           | 0회 | 1-3회 | 4-5회 | 6-7회 | 8회 이상 |
| 6. 나는 연구에서 나온 근거를 보고서나 프리젠테이션 형태로 2명 이상의 동료와 공유하였다.                                                                                      | 0회 | 1-3회 | 4-5회 | 6-7회 | 8회 이상 |
| 7. 나는 임상실무의 변화에 따른 결과를 평가하였다.                                                                                                            | 0회 | 1-3회 | 4-5회 | 6-7회 | 8회 이상 |
| 8. 나는 근거기반 실무지침을 동료와 공유하였다.                                                                                                              | 0회 | 1-3회 | 4-5회 | 6-7회 | 8회 이상 |
| 9. 나는 연구에서 나온 근거를 환자나 그 가족과 공유하였다.                                                                                                       | 0회 | 1-3회 | 4-5회 | 6-7회 | 8회 이상 |
| 10. 나는 연구에서 나온 근거를 다학제적 팀원들(의사, 전문간호사, 영양사, 약사 등)과 공유하였다.                                                                                | 0회 | 1-3회 | 4-5회 | 6-7회 | 8회 이상 |
| 11. 나는 임상 연구를 읽고 비판적으로 평가하였다.                                                                                                            | 0회 | 1-3회 | 4-5회 | 6-7회 | 8회 이상 |
| 12. 나는 체계적 고찰에 대한 자료를 보기 위해 코크란(Cochrane)에 접속하였다.                                                                                        | 0회 | 1-3회 | 4-5회 | 6-7회 | 8회 이상 |
| 13. 나는 임상지침데이터베이스 National Guideline Clearinghouse(NGC)*에 접속하였다.<br>*미국 정부에서 주도하는 임상지침 데이터베이스로서 개발된 진료지침, 진료지침의 개발 방법론, 활용방안을 웹을 통해 제공함. | 0회 | 1-3회 | 4-5회 | 6-7회 | 8회 이상 |
| 14. 나는 내가 일하는 곳의 임상실무를 변화시키기 위해 근거기반실무지침이나 체계적 고찰을 이용하였다.                                                                                | 0회 | 1-3회 | 4-5회 | 6-7회 | 8회 이상 |
| 15. 나는 환자 결과 자료를 수집하여 간호 계획을 얼마나 달성했는지 평가하였다.                                                                                            | 0회 | 1-3회 | 4-5회 | 6-7회 | 8회 이상 |
| 16. 나는 수집한 환자 결과 자료를 동료들과 공유하였다.                                                                                                         | 0회 | 1-3회 | 4-5회 | 6-7회 | 8회 이상 |
| 17. 나는 환자의 결과 자료에 근거하여 실무를 변화시켰다.                                                                                                        | 0회 | 1-3회 | 4-5회 | 6-7회 | 8회 이상 |
| 18. 나는 동료들에게 근거기반실무를 적용하도록 권장하였다.                                                                                                        | 0회 | 1-3회 | 4-5회 | 6-7회 | 8회 이상 |
